# Supplementary figures and images for: Effectiveness of Preoperative Immunonutrition in Improving Surgical Outcomes after Radical Cystectomy for Bladder Cancer: Study Protocol for a Multicentre, Open-Label, Randomised Trial (INu-RC)
Source: MDPI journal article supplement (doi:10.3390/healthcare12060696), 2024-03-20

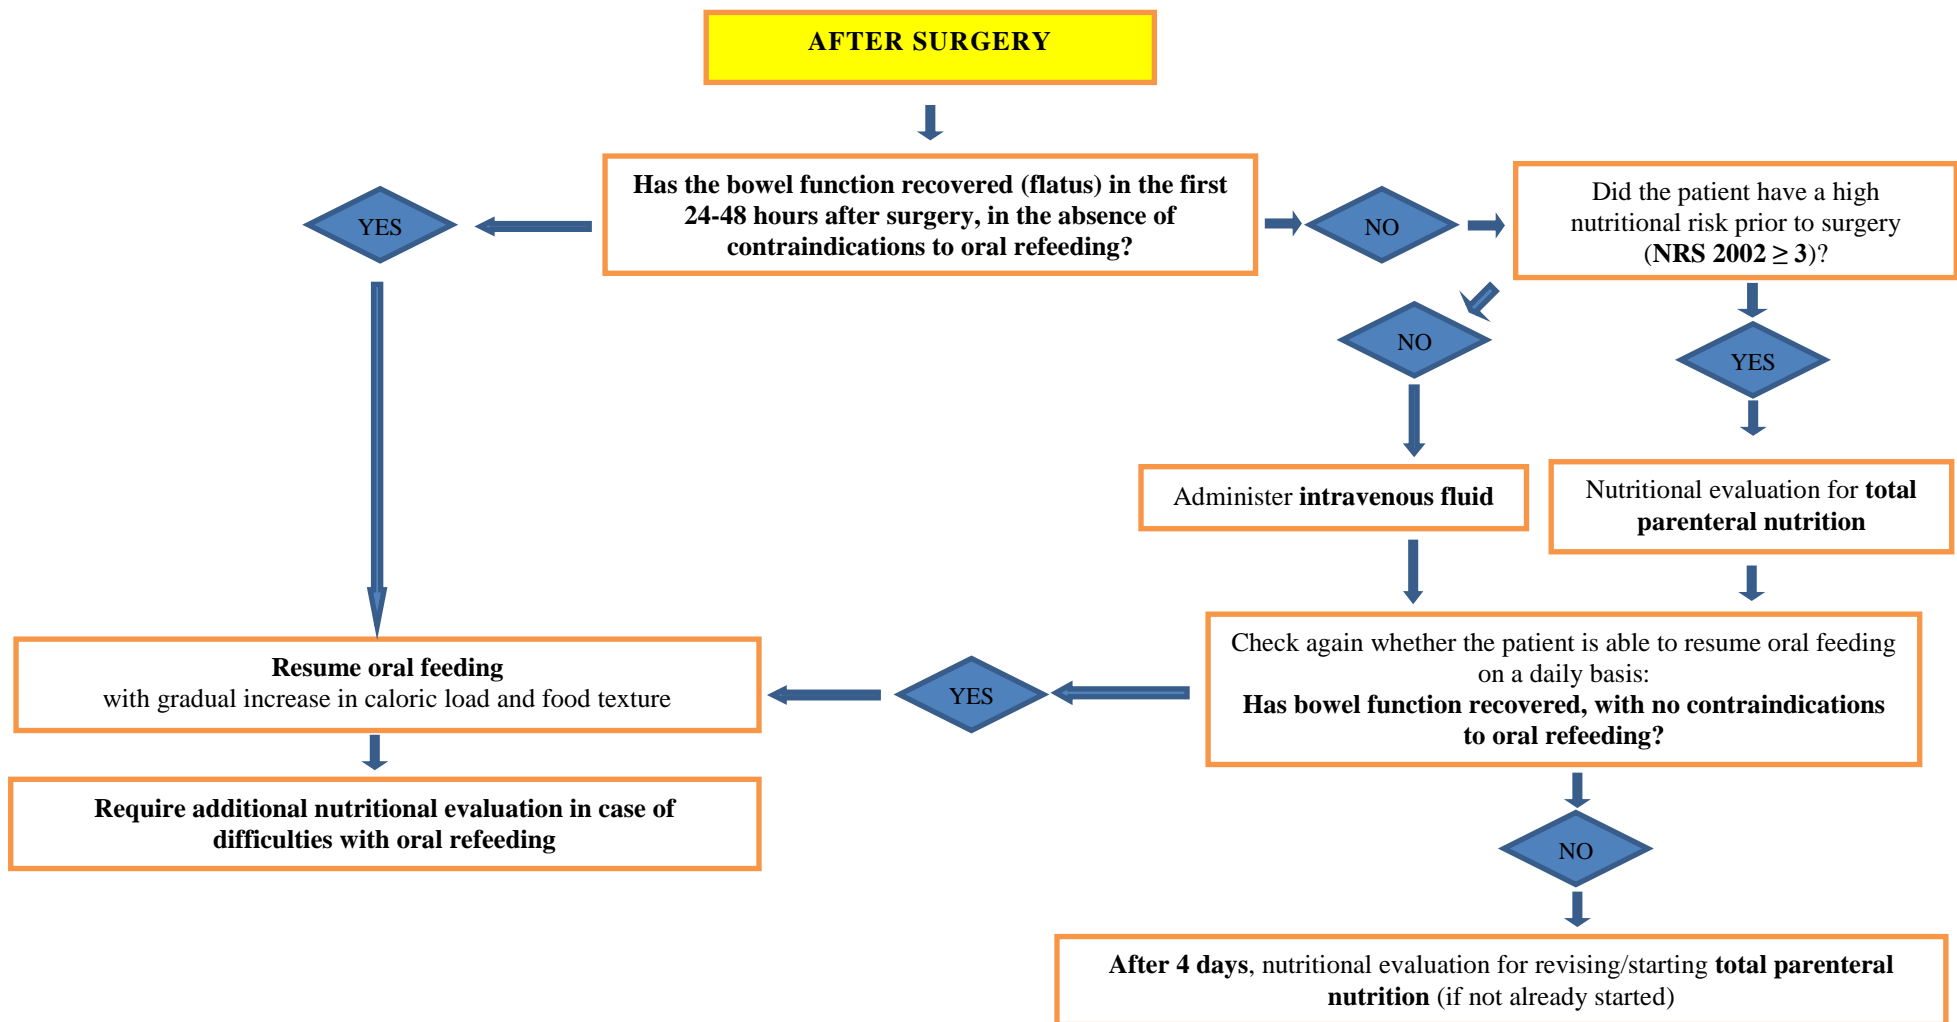

Supplement: s1 [file s1]
